# Supplementary material
Source: PubMed Central journal article supplement (PMC8220996)
Supplement: NEJMoa2101544_data-sharing.pdf [file NEJMoa2101544_data-sharing.pdf]

## Data Sharing Statement

Sadoff J, Gray G, Vandebosch A, et al. Safety and Efficacy of Single-Dose Ad26.COV2.S Vaccine against Covid-19. N Engl J Med. DOI: 10.1056/NEJMoa2101544.

| Question                                                            | Authors' Response                                                                                                                                                                                                                                                                                                                                                                                                       |
|---------------------------------------------------------------------|-------------------------------------------------------------------------------------------------------------------------------------------------------------------------------------------------------------------------------------------------------------------------------------------------------------------------------------------------------------------------------------------------------------------------|
| Will the data collected for your study be made available to others? | Yes                                                                                                                                                                                                                                                                                                                                                                                                                     |
| Would you like to offer context for your decision?                  | —                                                                                                                                                                                                                                                                                                                                                                                                                       |
| Which data?                                                         | Complete de-identified patient data set                                                                                                                                                                                                                                                                                                                                                                                 |
| Additional information about data                                   | —                                                                                                                                                                                                                                                                                                                                                                                                                       |
| How or where can the data be obtained?                              | The data sharing policy of Janssen Pharmaceutical Companies of Johnson & Johnson is available at <a href="https://www.janssen.com/clinical-trials/transparency">https://www.janssen.com/clinical-trials/transparency</a> . As noted on this site, requests for access to the study data can be submitted through Yale Open Data Access (YODA) Project site at <a href="http://yoda.yale.edu">http://yoda.yale.edu</a> . |
| When will data availability begin?                                  | With publication                                                                                                                                                                                                                                                                                                                                                                                                        |
| When will data availability end?                                    | —                                                                                                                                                                                                                                                                                                                                                                                                                       |
| Will any supporting documents be available?                         | —                                                                                                                                                                                                                                                                                                                                                                                                                       |
| Which supporting documents?                                         | —                                                                                                                                                                                                                                                                                                                                                                                                                       |
| Additional information about supporting documents                   | —                                                                                                                                                                                                                                                                                                                                                                                                                       |
| How or where can supporting documents be obtained?                  | The study protocol and statistical analysis plan are available at NEJM.org.                                                                                                                                                                                                                                                                                                                                             |
| When will supporting documents availability begin?                  | With publication                                                                                                                                                                                                                                                                                                                                                                                                        |
| When will supporting documents availability end?                    | —                                                                                                                                                                                                                                                                                                                                                                                                                       |
| To whom will data be available?                                     | N/A                                                                                                                                                                                                                                                                                                                                                                                                                     |
| For what type of analysis or purpose?                               | N/A                                                                                                                                                                                                                                                                                                                                                                                                                     |
| By what mechanism?                                                  | N/A                                                                                                                                                                                                                                                                                                                                                                                                                     |
| Any other restrictions?                                             | N/A                                                                                                                                                                                                                                                                                                                                                                                                                     |
| Additional information                                              | N/A                                                                                                                                                                                                                                                                                                                                                                                                                     |

This statement was posted on April 21, 2021, at NEJM.org.
